# Supplementary material
Source: HighWire-hosted journal article supplement (http://www.jrheum.org/highwire/filestream/32883/field_highwire_adjunct_files/0/170138__Data_Suppl.pdf)
Supplement: 170138__Data_Suppl.pdf [file 170138__Data_Suppl.pdf]

**Supplementary Table 1a.** Meant PET/CT uptake scores per individual vascular territory in TAB+ GCA and control patients.

|                       | <b>TAB+ (18)</b> | <b>Controls (28)</b> | <b>P-value</b> |
|-----------------------|------------------|----------------------|----------------|
| Ascending aorta       | 1.47± 0.53       | 1.14± 0.64           | 0.112          |
| Aortic arch           | 1.67± 0.34       | 1.23± 0.46           | 0.002          |
| Descending aorta      | 1.25± 0.65       | 0.89± 0.46           | 0.038          |
| Carotids              | 1.06± 0.51       | 0.8± 0.55            | 0.124          |
| Subclavian/axillaries | 1.36± 0.48       | 0.84± 0.41           | <0.001         |
| Abdominal aorta       | 1.22± 0.62       | 0.75± 0.4            | 0.008          |
| Iliacs                | 1.14± 0.54       | 0.79± 0.52           | 0.038          |
| Femorals              | 1.69± 0.42       | 1.29± 0.48           | 0.004          |
| Total                 | 10.9± 2.6        | 7.7± 2.6             | <0.001         |

Values listed indicate visual uptake scores ± SD. P value is a non-parametric Kruskal-Wallis test global p-value. Multiple comparisons were done per outcome, therefore p<0.025 is considered statistically significant using a Bonferroni adjustment.

**Supplementary Table 1b.** Mean PET/CT uptake scores per individual vascular territory in TAB- GCA and control patients.

|                       | <b>TAB- (10)</b> | <b>Controls (28)</b> | <b>P-value</b> |
|-----------------------|------------------|----------------------|----------------|
| Ascending aorta       | 1.35± 0.47       | 1.14± 0.64           | 0.426          |
| Aortic arch           | 1.55± 0.44       | 1.23± 0.46           | 0.071          |
| Descending aorta      | 1.00± 0.41       | 0.89± 0.46           | 0.356          |
| Carotids              | 1.1± 0.66        | 0.8± 0.55            | 0.214          |
| Subclavian/axillaries | 1.05± 0.37       | 0.84± 0.41           | 0.128          |
| Abdominal aorta       | 0.9±0.32         | 0.75±0.4             | 0.193          |
| Iliacs                | 1.0± 0.41        | 0.79± 0.52           | 0.164          |
| Femorals              | 1.45± 0.76       | 1.29± 0.48           | 0.887          |
| Total                 | 9.4± 2.8         | 7.7± 2.6             | 0.16           |

Values listed indicate visual uptake scores ± SD. P value is a non-parametric Kruskal-Wallis test global p-value. Multiple comparisons done per outcome, therefore p<0.025 is considered statistically significant under a Bonferroni adjustment.
